# Supplementary material for: Online Problem-Based Learning Intervention on Self-Directed Learning and Problem-Solving through Group Work: A Waitlist Controlled Trial
Source: MDPI journal article supplement (doi:10.3390/ijerph19020720), 2022-01-10
Supplement: s1 [file s1]

## Supplementary Materials S1

Before a semester starts, the course coordinator will prepare adequate learning materials and guidelines for students. In this study, there are six case scenarios using problem-based learning to enhance students' learning. The sample case scenario was illustrated below.

### **Sample case scenario**

#### **Lesson 1**

Expected learning objectives: (tutor can allow students or guide students to set their own achievable objectives)

Students are able to

- Understand their roles and responsibility in a group project
- Understand that they will have oral presentation about the case and the topic at the end of the course
- Distribute tasks to student groups and establish objectives for next meeting

#### **The sample case scenario related to obesity for Lesson 2:**

Ted is a 12-year-old boy. He visits your primary clinic with his mother today. Ted is 180 pounds and 140 cm tall. Ted cried that he has no friends in school.

#### **Preparation for Lesson 2**

Expected learning objectives:

Students are able to

- understand the common health concerns in a 12-year-old teen.
- identify possible health problem(s) attributed to obesity.
- perform relevant physical assessment for obesity

#### **The sample case scenario for Lesson 3:**

Ted appears very upset due to his appearance. He feels that he is being bullied. He cried that he has no friends in school.

#### **Preparation for Lesson 3**

Expected learning objectives:

Students are able to

- discuss physical impacts due to obesity and related physical health needs
- discuss psychosocial impacts due to obesity and related psychosocial health needs
- discuss the consequence if the health problem is not resolved.

### **The sample case scenario for Lesson 4:**

Ted likes eating snacks and cake. He understands that he needs to control his weight. You are his nurse and are going to discuss with him about weight control programme.

### **Preparation for Lesson 4**

Expected learning objectives:

Students are able to

- develop an interventional plan for appropriate care and treatment
- discuss effective strategies to reduce the vulnerabilities
- apply available resources from community

### **The sample case scenario for Lesson 5:**

Ted works out the plan for his weight control. He comes back for the follow up and further evaluation.

### **Preparation for Lesson 5**

Expected learning objectives:

- understand the difficulties in working out the plan and the coping strategies used by Ted
- Give positive support and appreciation if appropriate
- Evaluate if the interventional plan is workable

### **Preparation for Lesson 6**

Expected learning objectives:

- Students are able to gather and conclude all information they have learned.

### **Lesson 6: Reflection**

Students are required to reflect their learning through individual and group learning throughout the semester. They will have feedback from their tutor.
